# Supplementary material for: Toxicity and efficacy of green tea catechin derivative-based micellar nanocomplexes for anticancer protein delivery
Source: Royal Society of Chemistry journal article supplement (doi:10.1039/d2bm01969h), 2023-01-01
Supplement: d2bm01969h2.pdf [file d2bm01969h2.pdf]

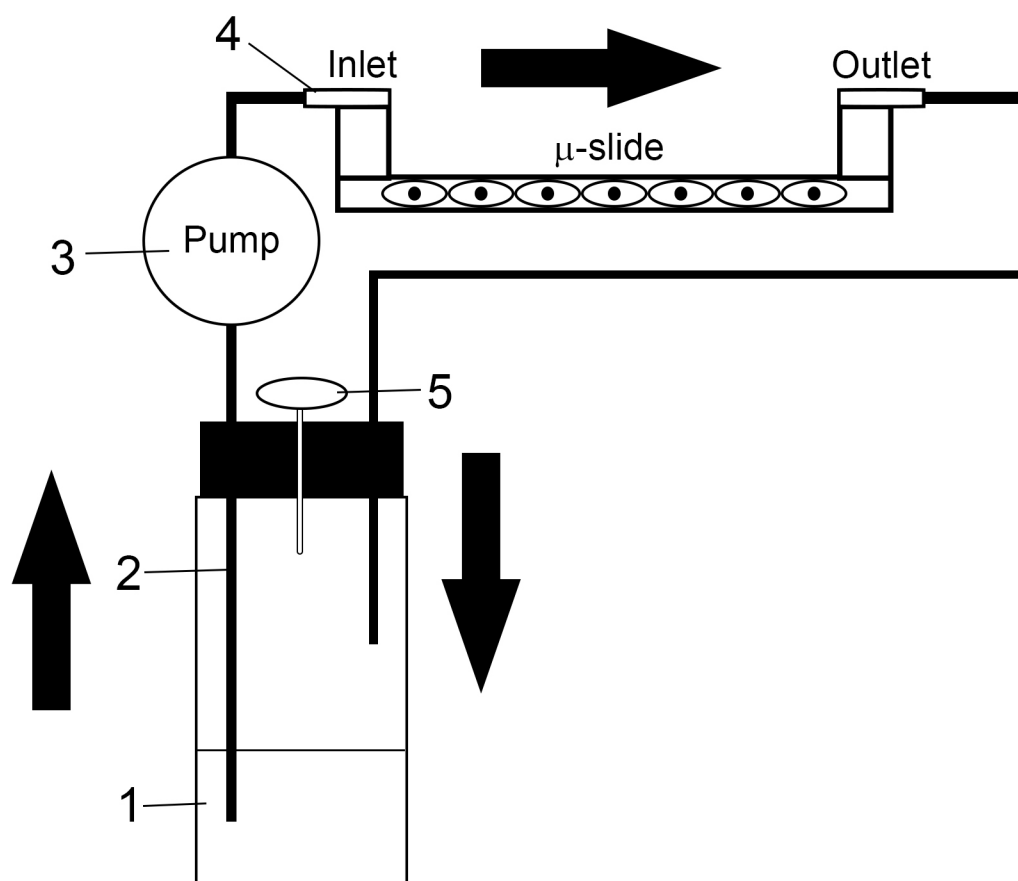

Supplementary Information  
Figure S1

**a**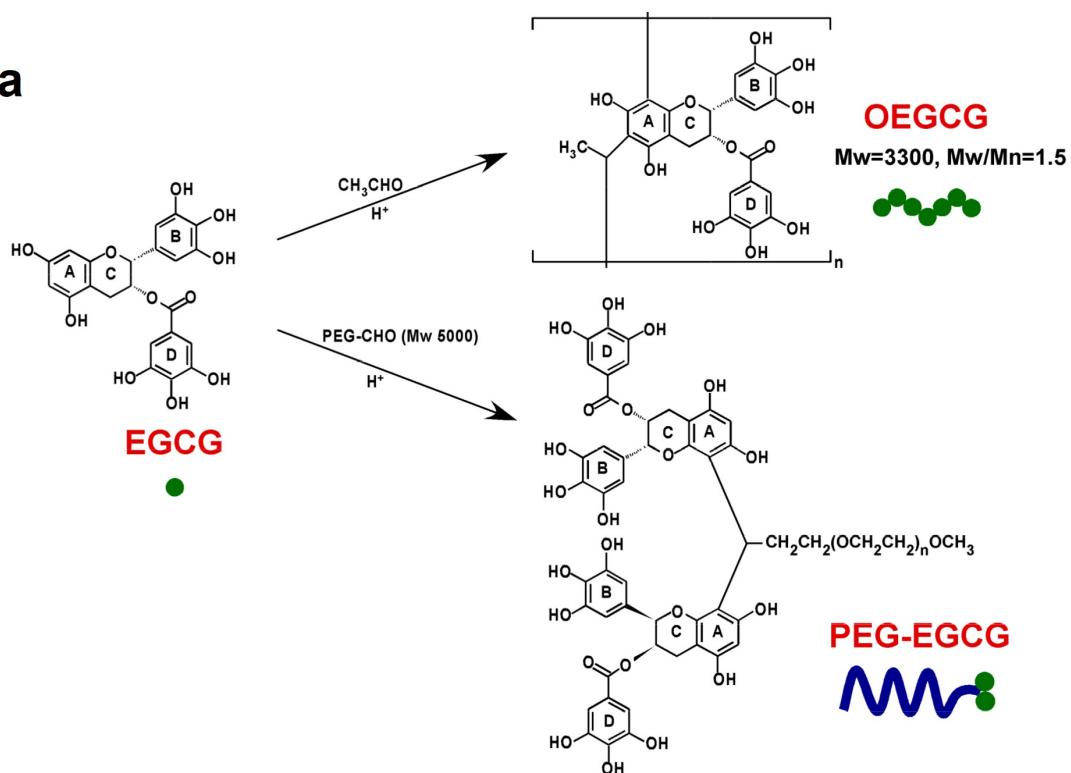**b**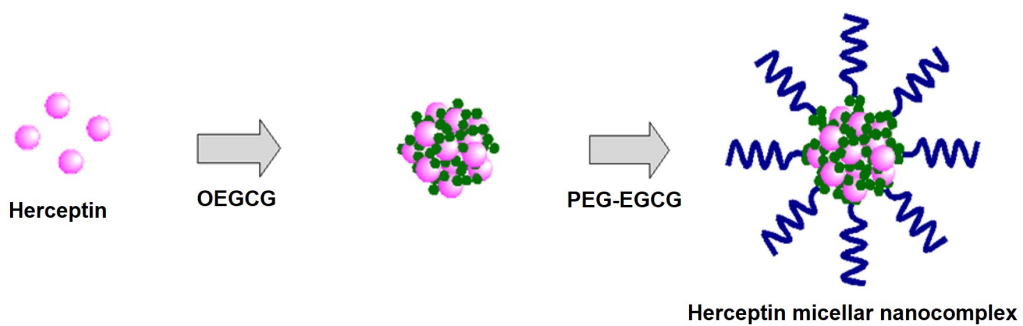

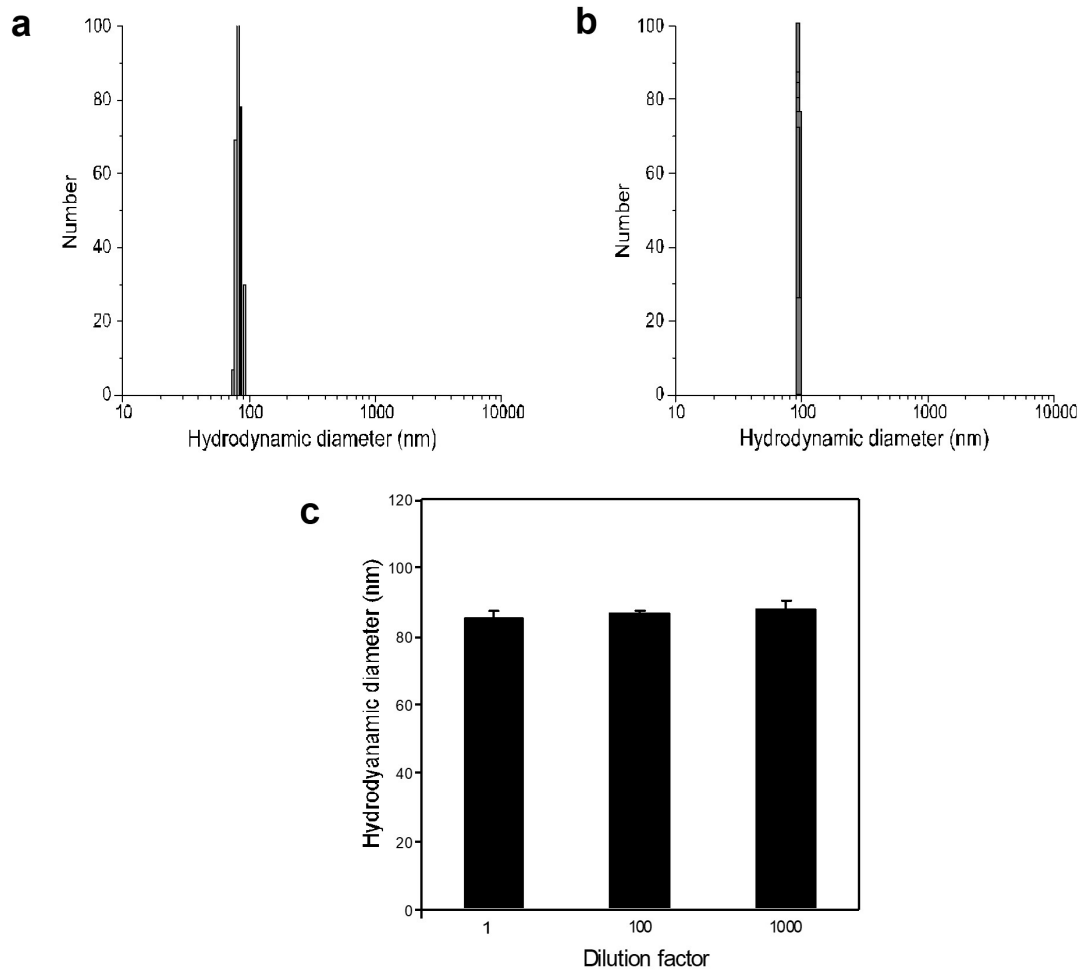

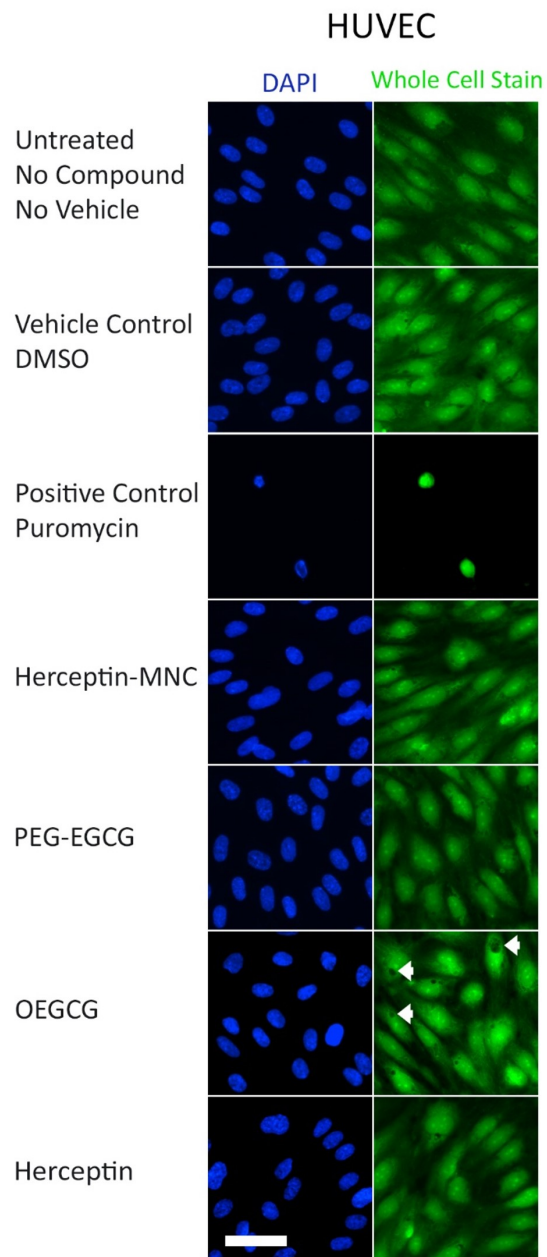

Supplementary Information  
Figure S4

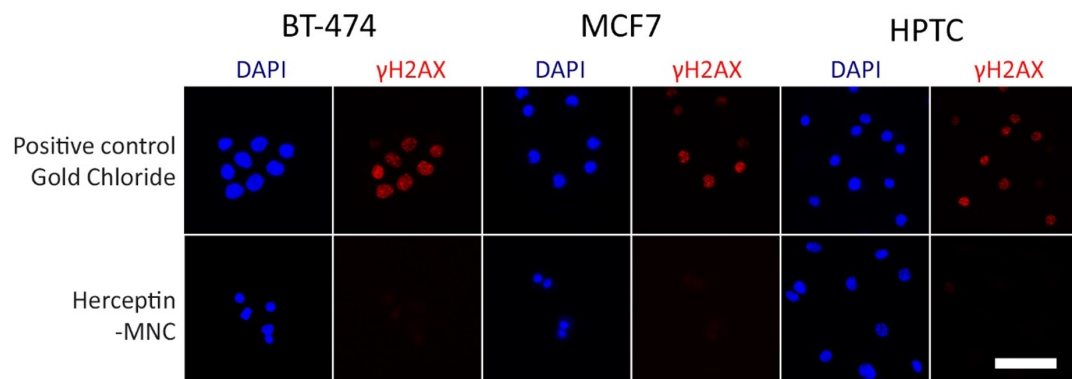

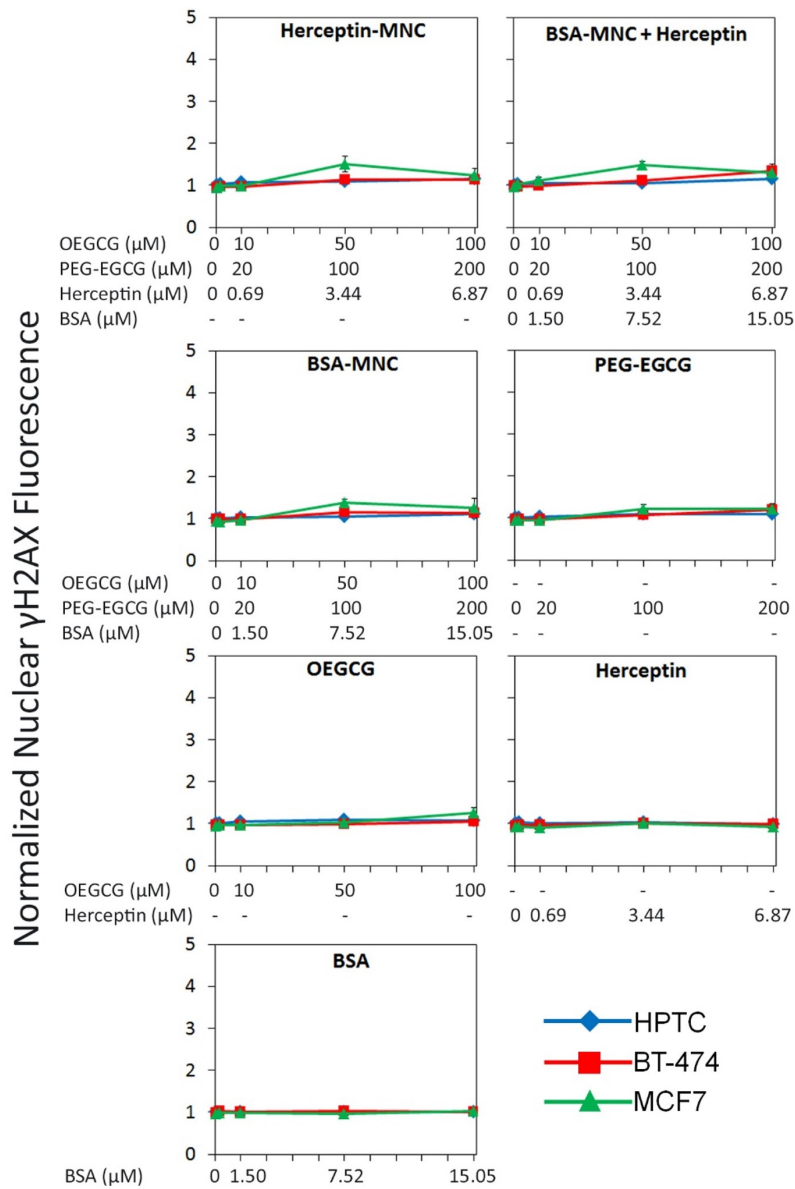

Supplementary Information  
Figure S6

## BT-474/HUVEC Co-culture

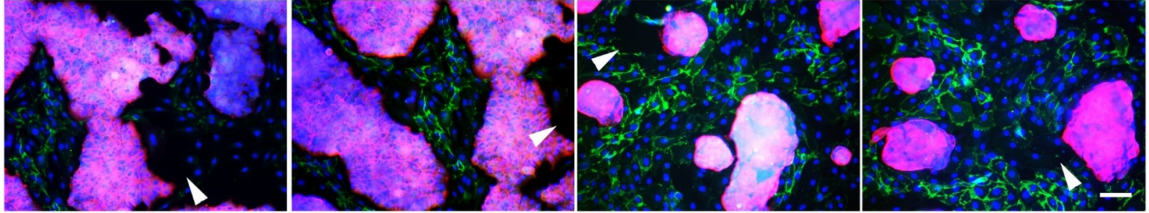

Untreated (no compound, no vehicle), Day 7
